# Supplementary material for: The luminescent semiconductor Pb7I6(CN2)4
Source: Royal Society of Chemistry journal article supplement (doi:10.1039/d4dt00369a), 2024-01-01
Supplement: d4dt00369a1.pdf [file d4dt00369a1.pdf]

## The Luminescent Semiconductor $\text{Pb}_7\text{I}_6(\text{CN}_2)_4$

Albert T. Schwarz <sup>a</sup>, Markus Ströbele <sup>a</sup>, Carl P. Romao <sup>b</sup>, David Ensling <sup>c</sup>, Thomas Jüstel <sup>c</sup> and H.-Jürgen Meyer <sup>\*a</sup>

### Supporting Information:

Table S 1: Wyckoff position, site occupation factors and atomic coordinates of  $\text{Pb}_7\text{I}_6(\text{CN}_2)_4$

| Atom | Wyck. | Site | S.O.F. | x/a         | y/b         | z/c        |
|------|-------|------|--------|-------------|-------------|------------|
| Pb1  | 12k   | .m.  |        | -0.21139(2) | 0.21139(2)  | 0.67292(2) |
| Pb2  | 4f    | 3m.  |        | -2/3        | -1/3        | 0.67125(2) |
| Pb3  | 12k   | .m.  |        | -0.41586(3) | -0.20793(2) | 0.56014(2) |
| Pb4  | 4f    | 3m.  |        | -1/3        | 1/3         | 0.55141(2) |
| Pb5  | 4e    | 3m.  | 0.75   | 0           | 0           | 0.61669(2) |

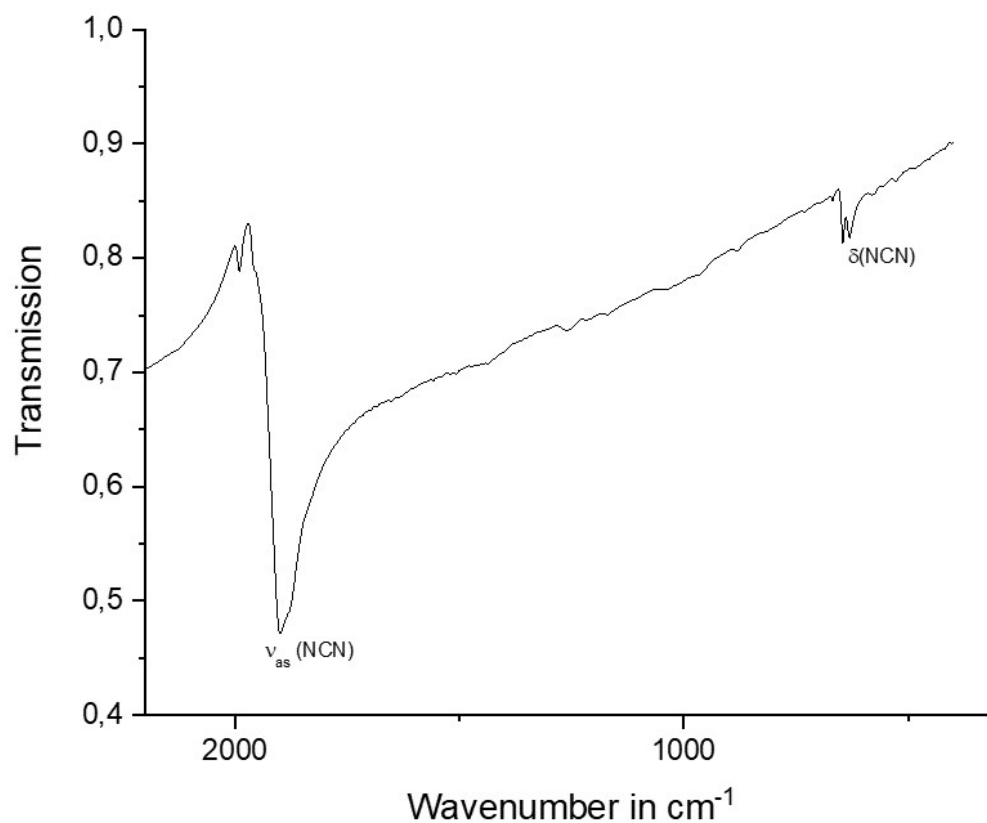

Figure S 1: Infrared spectrum of  $\text{Pb}_7\text{I}_6(\text{CN}_2)_4$

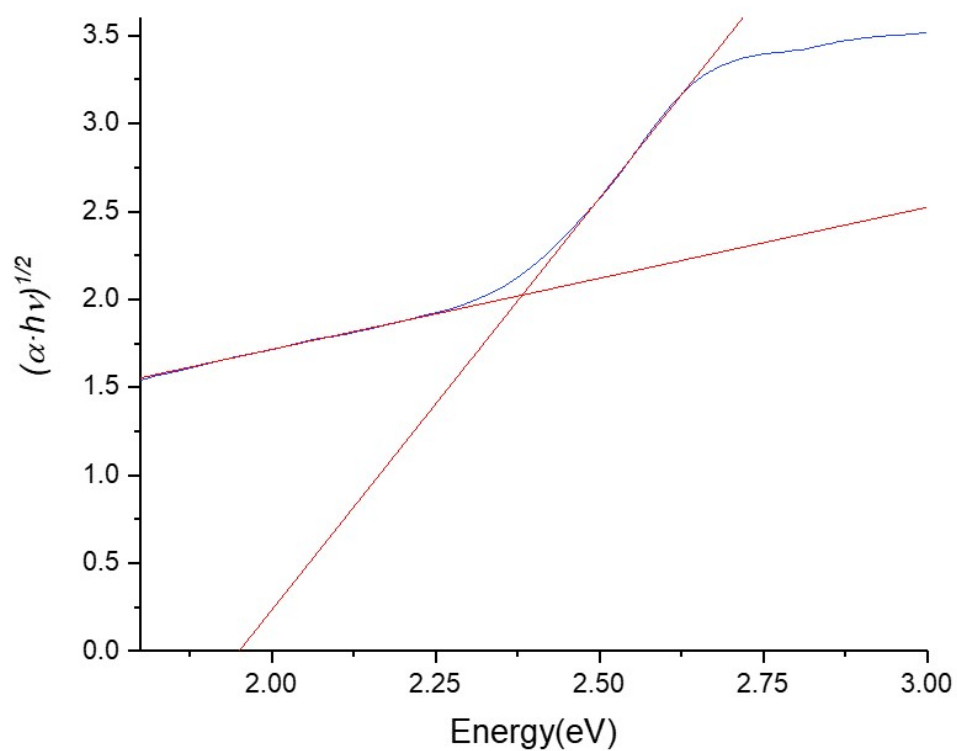

Figure S 2: Tauc plot for indirect allowed transition of  $\text{Pb}_7\text{I}_6(\text{CN}_2)_4$

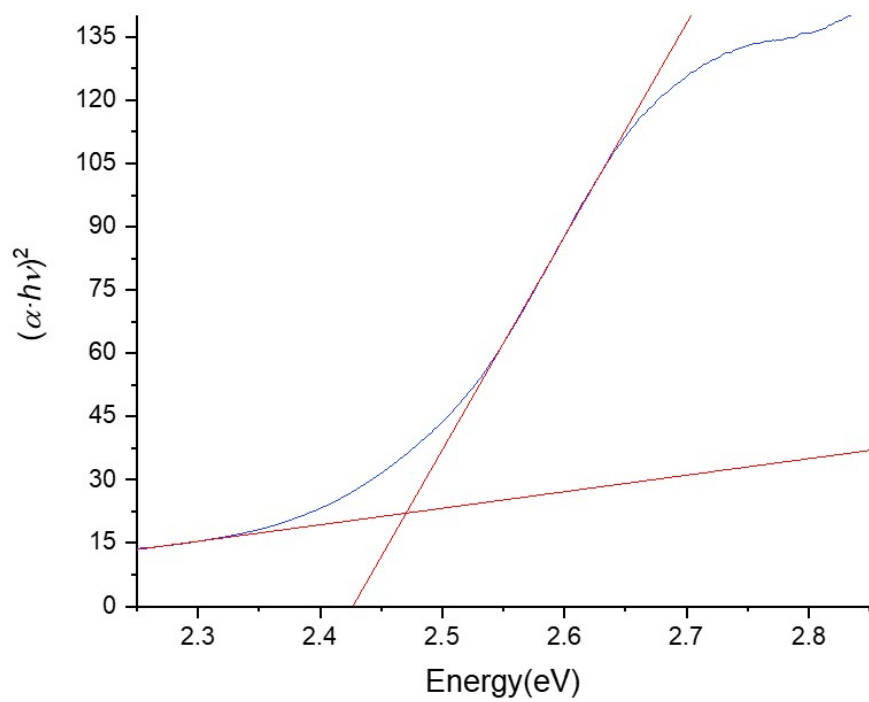

Figure S 3: Tauc plot for direct allowed transition of  $\text{Pb}_7\text{I}_6(\text{CN}_2)_4$

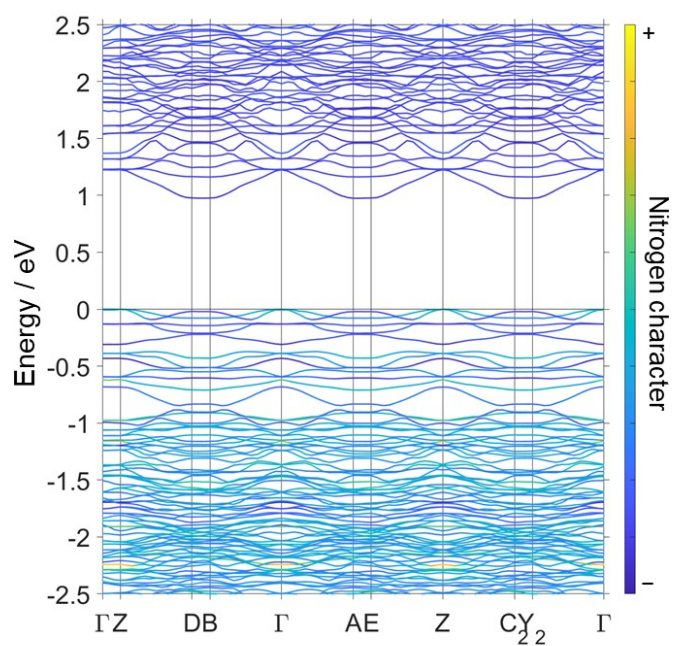

Figure S 4: The electronic band structure of  $\text{Pb}_7\text{I}_6(\text{CN}_2)_4$ , with bands coloured by their N character, on the same scale as Figure 5. Special points in and paths through the Brillouin Zone were chosen following literature.
